# Supplementary material for: The wetting behavior of aqueous imidazolium based ionic liquids: a molecular dynamics study
Source: Royal Society of Chemistry journal article supplement (doi:10.1039/d0cp00143k), 2020-01-01
Supplement: d0cp00143k1.pdf [file d0cp00143k1.pdf]

## Supplementary Information

### The Wetting Behavior of Aqueous Imidazolium Based Ionic Liquids: A Molecular Dynamics Study

*Sanchari Bhattacharjee, Sandip Khan\**

Department of Chemical & Biochemical Engineering

Indian Institute of Technology Patna, Bihar 801003, India

#### Section S1: Interaction Energy

The equilibration of droplet was traced by observing the interaction energy (solid-fluid interaction energy per molecule) to be constant (after graphite sheet being close to the droplet, i.e. after 10 ns see **Figure S1**). It can be observed from **Figure S2**, and **Figure S3** that time required to reach the equilibration is significantly high (about 30-40 ns) for pure ILs compared to that of aqueous IL (about 3-8 ns, see bottom **Figure S3** Furthermore, cations were found to have a larger contribution compare to that of the anions or water in solid-fluid interaction for both the ILs.

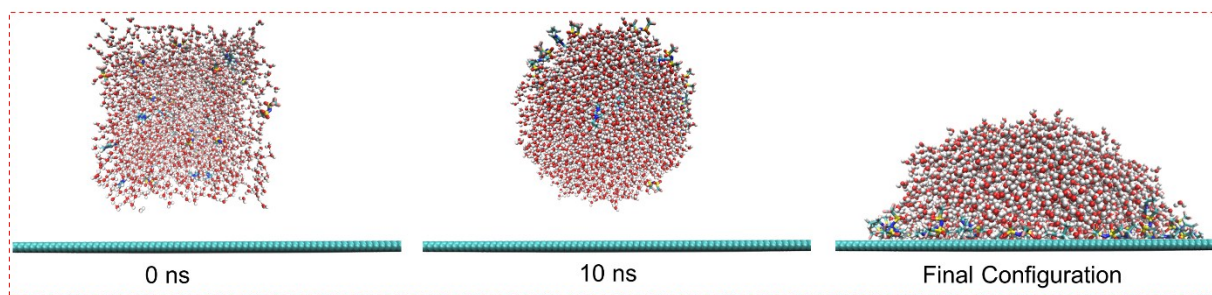

**Figure S1.** Shape evolution during equilibration of aqueous IL droplet.

---

\* Corresponding author: E-mail: [skhan@iitp.ac.in](mailto:skhan@iitp.ac.in)

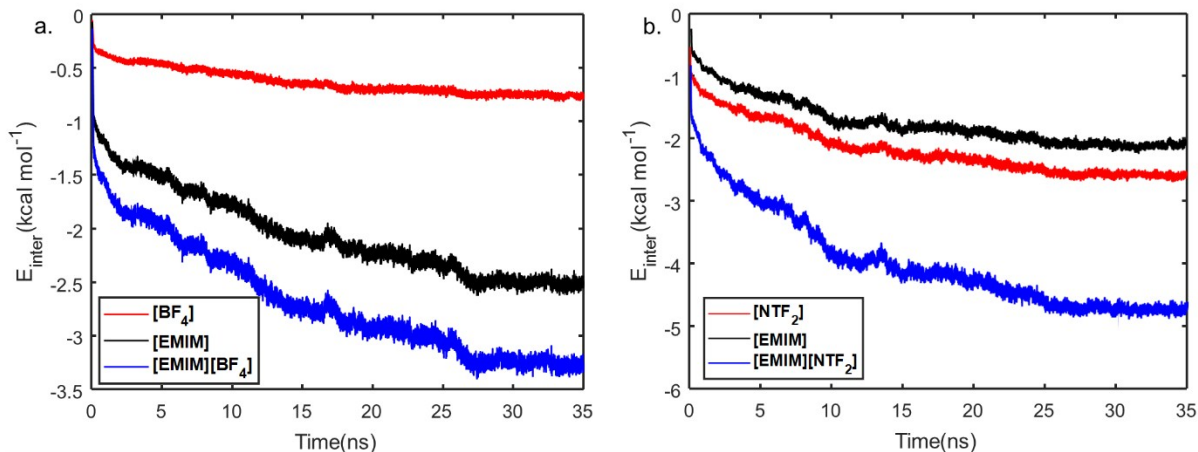

**Figure S2.** Solid-fluid interaction energy per number of molecules for pure ILs (a.) [EMIM][BF<sub>4</sub>] and (b.) [EMIM][NTF<sub>2</sub>].

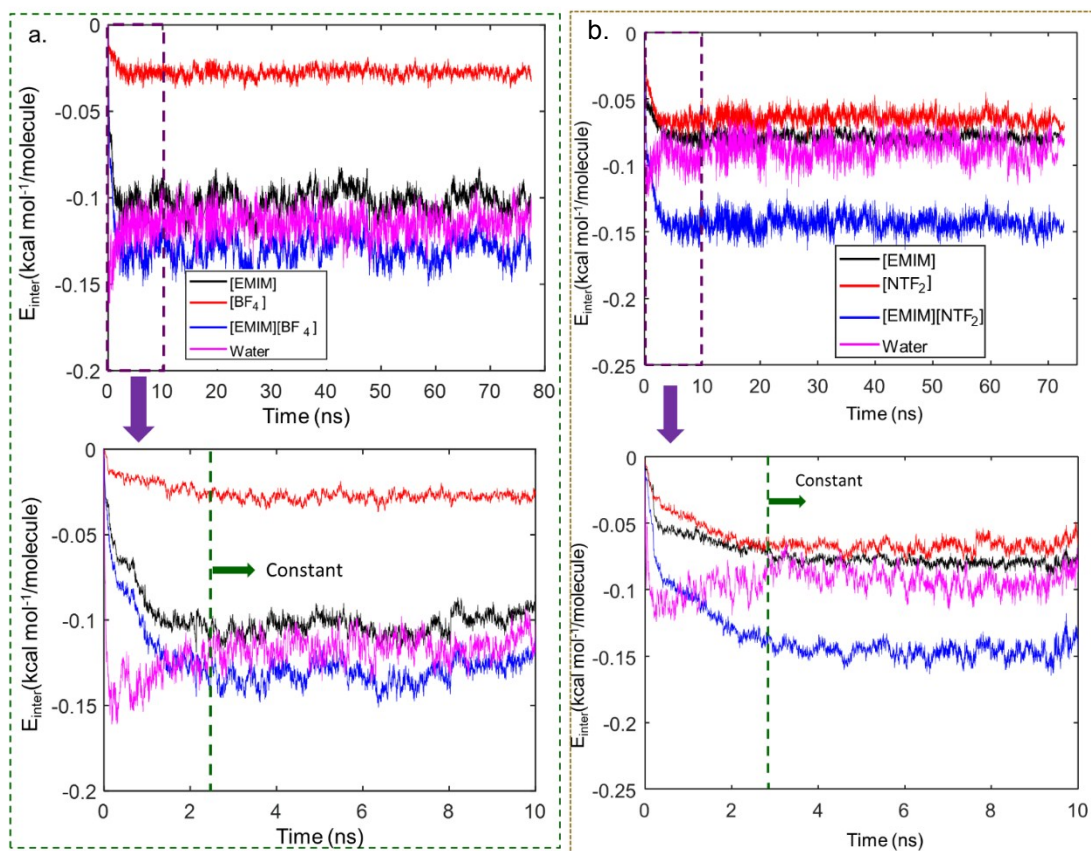

**Figure S3.** Evolution of various interaction energy for 20wt%ILs (a.) Solid-fluid interaction energy per number of molecule for [EMIM][BF<sub>4</sub>], and corresponding zoomed view from the

selected portion is shown bottom. All energy found nearly constant after the time  $> 2.5$  ns. (b.) Solid-fluid interaction energy per number of molecule for [EMIM][NTF<sub>2</sub>].

### Section S2: System size effect

To investigate the system size effect, we vary the number of water molecules from 2000 to 6000), for 40wt% (ion pair vary accordingly), and analyze the wetting behavior of the droplet by observing the contact angle. **Table S1** shows the contact angle dependency on the droplet size. For all the system size contact angle of [EMIM][BF<sub>4</sub>] droplet always higher than [EMIM][NTF<sub>2</sub>] droplet. No significant change is found in contact angle with system size.

**Table S1.**

angle of  
ILs with  
number  
molecules  
40wt%IL

| Number of water-<br>molecules | Contact angle (°)         |                          |
|-------------------------------|---------------------------|--------------------------|
|                               | [EMIM][NTF <sub>2</sub> ] | [EMIM][BF <sub>4</sub> ] |
| 2000                          | 68 ± 1.1                  | 72 ± 1.3                 |
| 3000                          | 68 ± 1.6                  | 72 ± 1.6                 |
| 4000                          | 69 ± 1.2                  | 73 ± 1.2                 |
| 6000                          | 69 ± 1.5                  | 73 ± 1.4                 |

Contact  
aqueous  
different  
of water  
for
